# Supplementary material for: A micro-laser grown from non-photoluminescent Cs 4 PbBr 6 nanocrystals
Source: Royal Society of Chemistry journal article supplement (doi:10.1039/d5tc00088b), 2025-01-01
Supplement: d5tc00088b1.pdf [file d5tc00088b1.pdf]

## Supporting Information

### A micro-laser grown from non-photoluminescence $\text{Cs}_4\text{PbBr}_6$ nanocrystals

Yichi Zhong<sup>1</sup>, Jian Huang<sup>1</sup>, Hongyu Yang<sup>3</sup>, Zhanpeng Wang<sup>2,3</sup>, Kun Qian<sup>2,3</sup>, Jingzhou Li<sup>3\*</sup>, Hongxing Dong<sup>2,3\*</sup>, Long Zhang<sup>2,3</sup>

<sup>1</sup> Department of Physics, Chengdu University of Technology, Chengdu 610059, China

<sup>2</sup> Shanghai Institute of Optics and Fine Mechanic, Chinese Academy of Sciences, Shanghai 201800, China

<sup>3</sup> Hangzhou Institute for Advanced Study, University of Chinese Academy of Science, Hangzhou 310024, China

\*Corresponding author: Jingzhou Li ([lijingzhou@ucas.ac.cn](mailto:lijingzhou@ucas.ac.cn)); Hongxing Dong ([hongxingd@siom.ac.cn](mailto:hongxingd@siom.ac.cn))

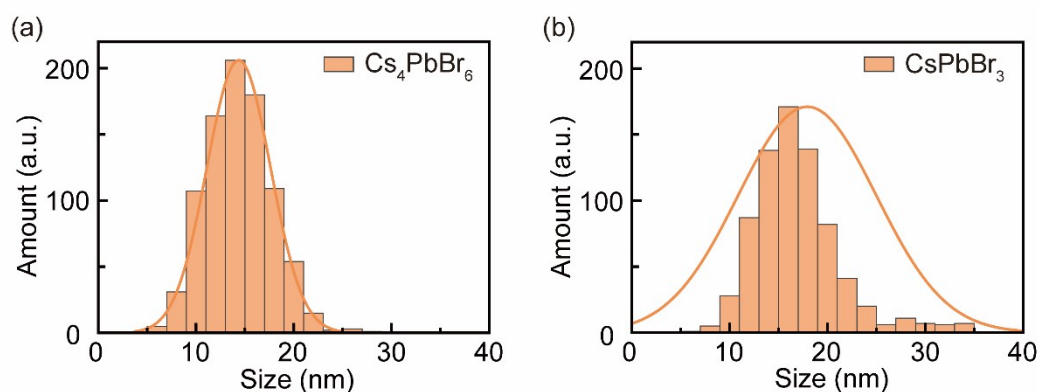

**Figure S1.** The size statistics of nanocrystals. a) The size distribution of synthesized  $\text{Cs}_4\text{PbBr}_6$  NCs, with the majority of nanocrystals ranging from 10 to 18 nm, and an average size of 14.3 nm. b) The size statistics of transformed  $\text{CsPbBr}_3$  NCs, showing a broader size distribution, with an average size of 18 nm.

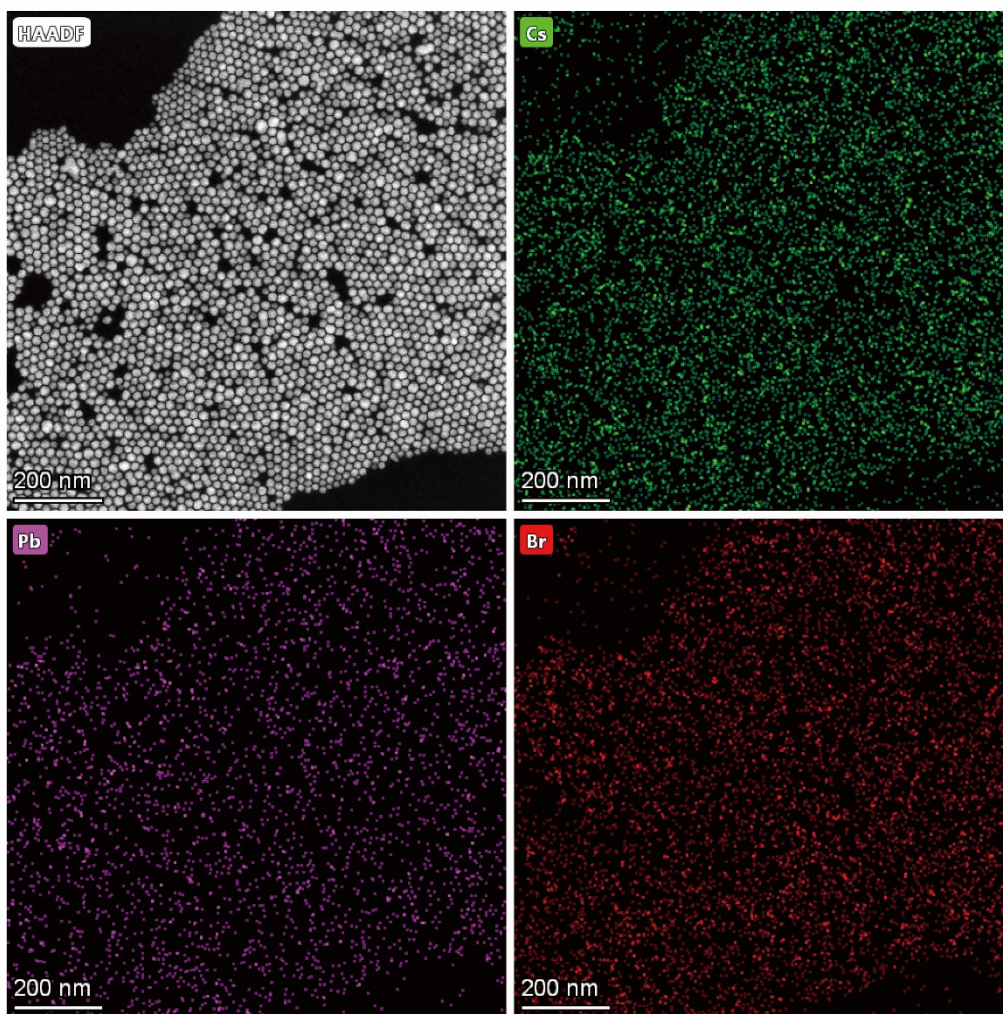

**Figure S2.** The TEM image and corresponding elemental mapping of synthesized  $\text{Cs}_4\text{PbBr}_6$  NCs show a clear and uniform distribution of Cs, Pb, and Br elements throughout the nanocrystals.

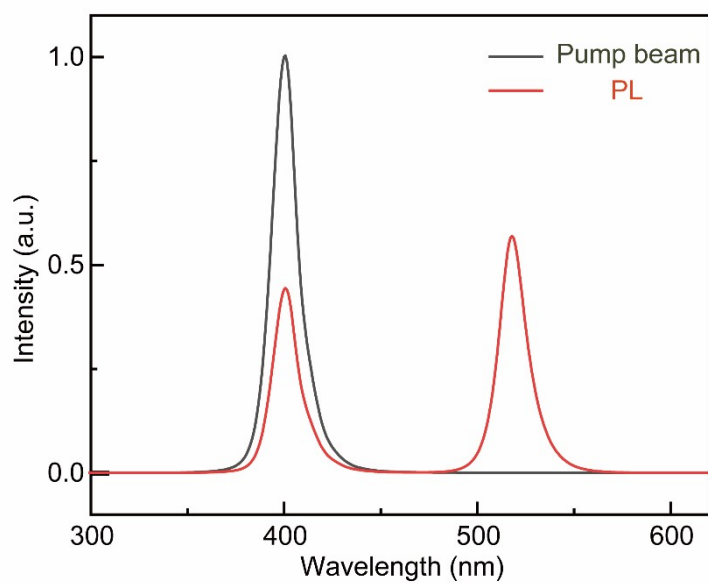

**Figure S3.** The PLQY of the transformed CsPbBr<sub>3</sub> NCs reaches up to 79%.

(a)

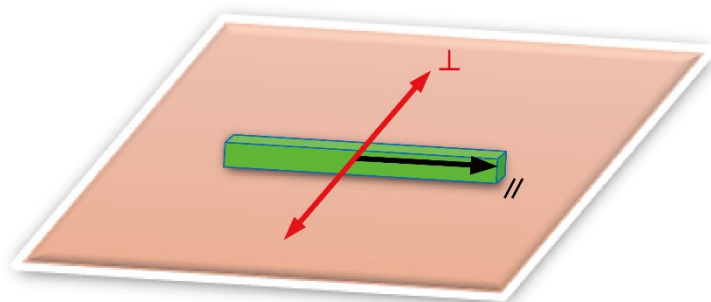

(b)

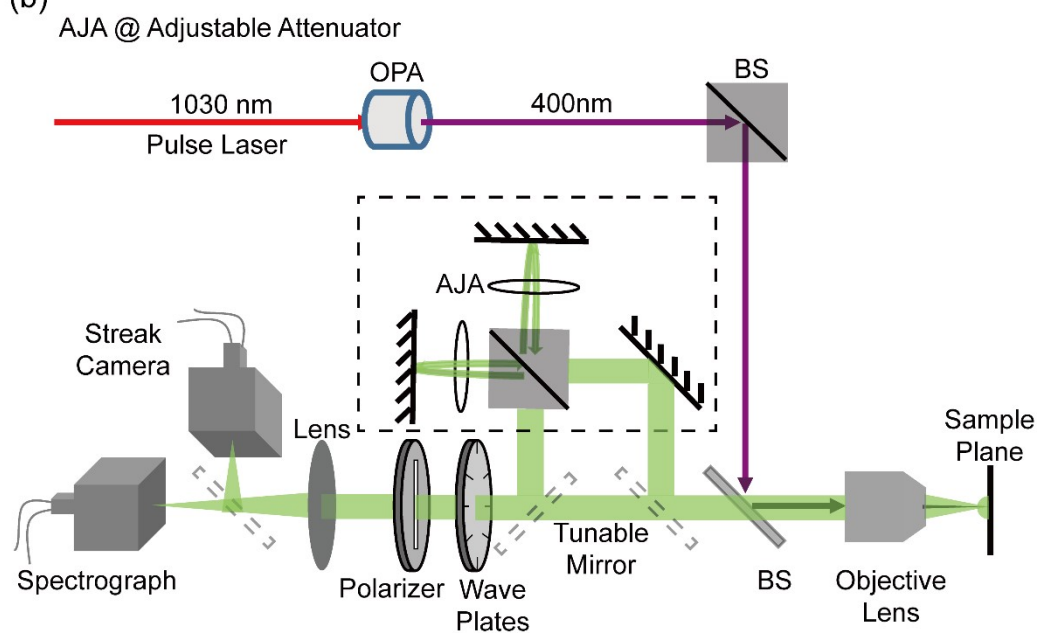

**Figure S4.** Experimental setup diagram. a) Schematic diagram of sample placement for polarization detection, with the PL signals collected through the nanowire's long axis direction (parallel) and cross-sectional direction (perpendicular). b) The custom-built confocal PL microscopy system, where the pump lasing source is tuned from 1030 nm to 400 nm by using an OPA.

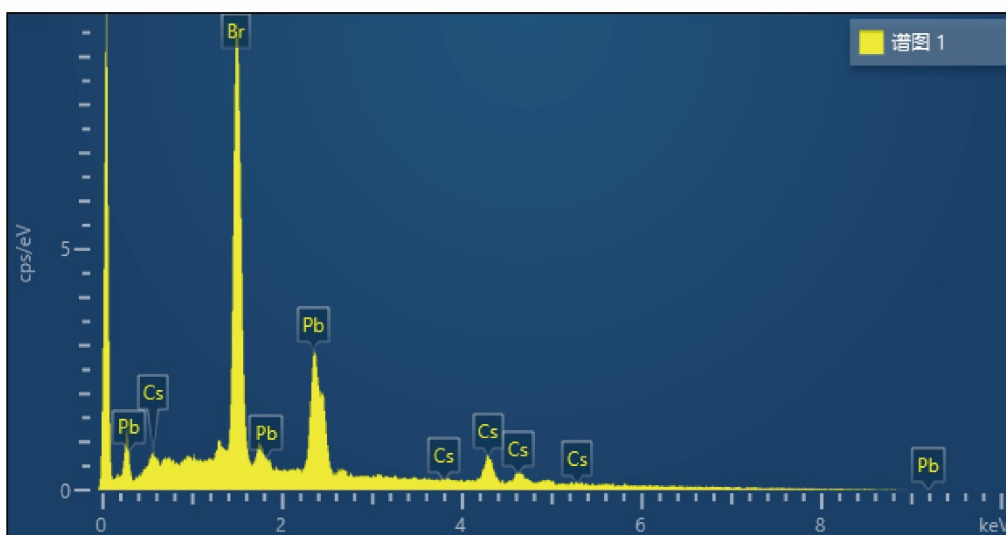

**Figure S5.** Elemental analysis of grown nanowires reveals the presence of only Cs, Pb, and Br elements, with a ratio close to 1:1:3.

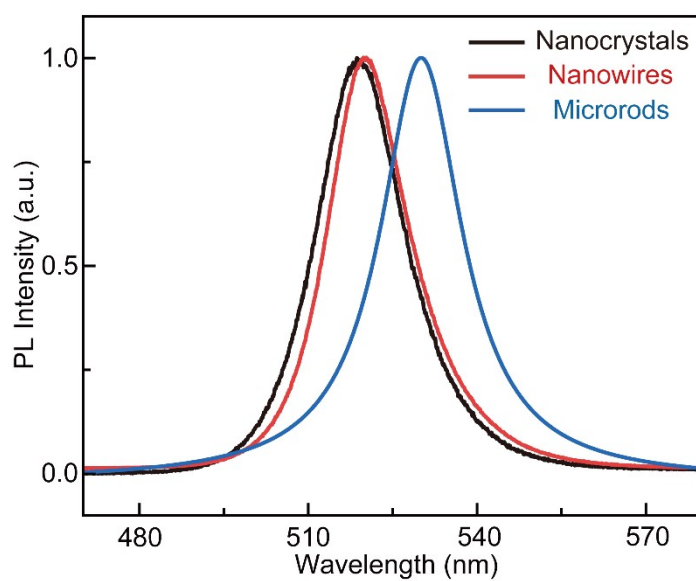

**Figure S6.** Normalized PL spectra of different CsPbBr<sub>3</sub> samples, including nanocrystals, nanowires, and microrods, demonstrate a redshift in the PL center wavelength as the sample size increases.

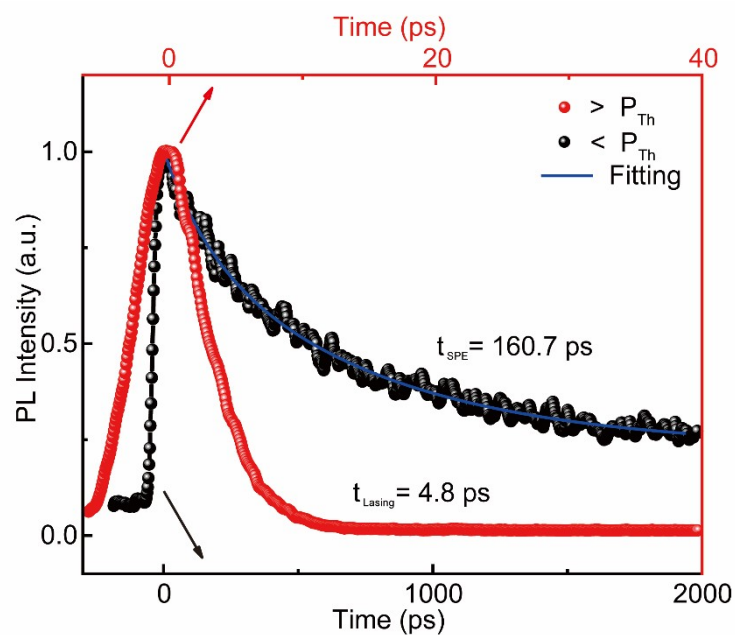

**Figure S7.** PL dynamics decay curves at pumping density of  $0.8 P_{Th}$  and  $1.8 P_{Th}$ , respectively. With the pumping density exceeding the threshold, the PL decay rate has increased.

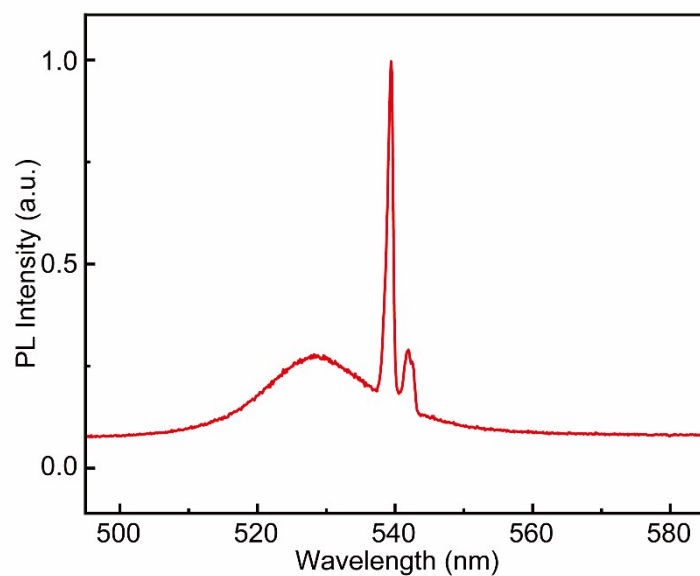

**Figure S8.** The larger-sized microrod exhibits multi-mode lasing emission under high pump density excitation.
